# Supplementary material
Source: MDPI journal article supplement (https://www.mdpi.com/2571-8789/8/2/57)
Supplement: s1 [file s1]

# Supplementary Information

## Growth Responses of *Holcus lanatus* L. (Velvet Grass) in Soils Contaminated with Cesium or Strontium

Bayezid M. Khan <sup>1,2</sup>, M. Ferdous Alam <sup>3,4</sup>, Zinnat A. Begum <sup>1</sup>, Ismail M. M. Rahman <sup>1,\*</sup>

<sup>1</sup>*Institute of Environmental Radioactivity, Fukushima University, 1 Kanayagawa,  
Fukushima City 960-1296, Fukushima, Japan*

<sup>2</sup>*Institute of Forestry and Environmental Sciences, Faculty of Science, University of  
Chittagong, Chattogram 4331, Bangladesh*

<sup>3</sup>*Graduate School of Symbiotic Systems Science and Technology, Fukushima University,  
1 Kanayagawa, Fukushima City 960-1296, Fukushima, Japan*

<sup>4</sup>*Institute of Nuclear Science and Technology, Atomic Energy Research Establishment,  
Ganakbari, Savar, Dhaka 1344, Bangladesh*

\*Author for correspondence.

E-mail: immrahman@ipc.fukushima-u.ac.jp

## Supplementary Information

**Table S1.** GLM output demonstrating the effects of various Cs-concentrations on the growth parameters of *Holcus lanatus*

| Source    | Parameter        | df | <i>F</i> | <i>P</i> |
|-----------|------------------|----|----------|----------|
| Treatment | Root length      | 5  | 17.03    | < 0.001  |
|           | Root dry         | 5  | 26.72    | < 0.001  |
|           | Shoot dry        | 5  | 14.10    | < 0.001  |
|           | Shoot-root ratio | 5  | 3.11     | 0.008    |

## Supplementary Information

**Table S2.** GLM output demonstrating the effects of various Sr-concentrations on the growth parameters of *Holcus lanatus*

| Source    | Parameter        | df | <i>F</i> | <i>P</i> |
|-----------|------------------|----|----------|----------|
| Treatment | Root length      | 5  | 8.55     | 0.001    |
|           | Root dry         | 5  | 15.47    | < 0.001  |
|           | Shoot dry        | 5  | 10.636   | < 0.001  |
|           | Shoot-root ratio | 5  | 4.81     | 0.012    |

## Supplementary Information

**Table S3.** GLM output demonstrating the effects of K-application in Cs-amended soil on the *Holcus lanatus* growth and elemental uptake

| Source    | Parameter          | df | <i>F</i> | <i>P</i> |
|-----------|--------------------|----|----------|----------|
| Treatment | Shoot dry          | 2  | 3.37     | 0.104    |
|           | Al                 | 2  | 3.016    | 0.124    |
|           | As                 | 2  | 5.82     | 0.039    |
|           | Ca                 | 2  | 9.76     | 0.013    |
|           | Co                 | 2  | 4.43     | 0.066    |
|           | Fe                 | 2  | 0.534    | 0.612    |
|           | K                  | 2  | 3.92     | 0.082    |
|           | Mg                 | 2  | 13.23    | 0.006    |
|           | Mn                 | 2  | 63.82    | < 0.001  |
|           | Mo                 | 2  | 18.3     | 0.003    |
|           | Na                 | 2  | 0.684    | 0.54     |
|           | Ni                 | 2  | 7.62     | 0.022    |
|           | P                  | 2  | 8.68     | 0.017    |
|           | Sr                 | 2  | 4.31     | 0.069    |
|           | Zn                 | 2  | 36.92    | < 0.001  |
|           | Cs                 | 2  | 289.12   | < 0.001  |
|           | Cs transfer factor | 2  | 13.78    | 0.006    |

## Supplementary Information

**Table S4.** GLM output demonstrating the effects of Ca-application in Sr-amended soil on the *Holcus lanatus* growth and elemental uptake

| Source    | Parameter          | df | <i>F</i> | <i>P</i> |
|-----------|--------------------|----|----------|----------|
| Treatment | Shoot dry          | 2  | 31.91    | 0.001    |
|           | Al                 | 2  | 21.18    | 0.002    |
|           | As                 | 2  | 0.47     | 0.46     |
|           | Ca                 | 2  | 9.04     | 0.015    |
|           | Co                 | 2  | 0.667    | 0.548    |
|           | Fe                 | 2  | 11.31    | 0.009    |
|           | K                  | 2  | 0.67     | 0.548    |
|           | Mg                 | 2  | 5.5      | 0.044    |
|           | Mn                 | 2  | 28.08    | 0.001    |
|           | Mo                 | 2  | 20.53    | 0.002    |
|           | Na                 | 2  | 20.42    | 0.002    |
|           | Ni                 | 2  | 9.2      | 0.015    |
|           | P                  | 2  | 8.22     | 0.019    |
|           | Zn                 | 2  | 84.22    | < 0.001  |
|           | Sr                 | 2  | 46.54    | < 0.001  |
|           | Sr transfer factor | 2  | 38.23    | < 0.001  |

## Supplementary Information

### Figures

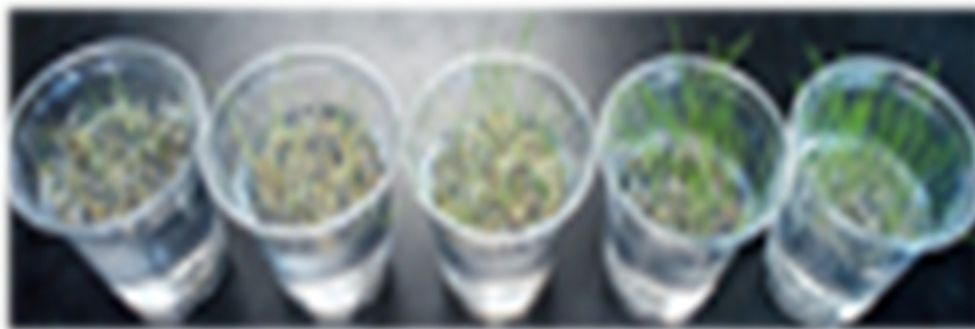

**Figure S1:** Growth characteristics of *H. lanatus* at different Cs-concentrations. From left to right: 0 (Control), 1, 2, 4, and 8 mg Cs L<sup>-1</sup>.

## Supplementary Information

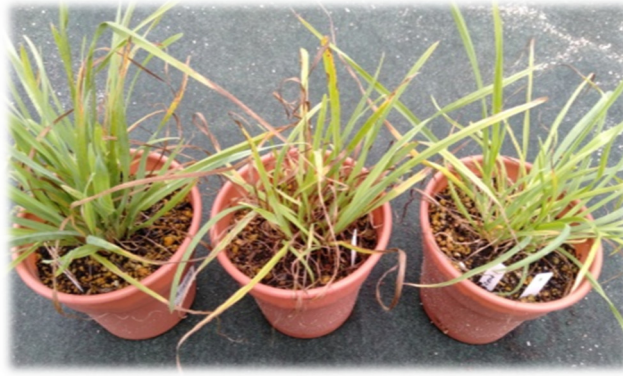

**Figure S2:** *Holcus lanatus* seedling growth in soil: Control (right), Sr (middle), and Sr + Ca (left).
